# Supplementary material for: Standardized Duplex Ultrasound-Based Protocol for Early Diagnosis of Transplant Renal Artery Stenosis: Results of a Single-Institution Retrospective Cohort Study
Source: Hindawi journal article supplement (doi:10.1155/2018/2580181), 2018-01-01

**Supplementary Table 1.** Clinical characteristics and functional outcomes at the latest follow-up among patients undergoing PTA + stenting in our study cohort. Of 52 patients, 9 (18%) patients were lost at follow-up.

| Patients alive at follow-up |        |                               |                                                                        |      |                                      |                 |                           |
|-----------------------------|--------|-------------------------------|------------------------------------------------------------------------|------|--------------------------------------|-----------------|---------------------------|
| At the time of surgery      |        |                               |                                                                        |      | At last follow-up                    |                 |                           |
| Patient n.                  | Gender | Cause of CKD                  | Age-adjusted<br>Charlson<br>Comorbidity<br>Index<br>(excluding<br>CKD) | BMI  | eGFR<br>(CKD-EPI<br>2009,<br>ml/min) | Re-<br>Dialysis | Graft<br>survival<br>(mo) |
| 1                           | Male   | Fabry disease                 | 2                                                                      | 29,4 | 44                                   | No              | 128                       |
| 2                           | Female | Chronic<br>Pyelonephritis     | 1                                                                      | 28,1 | 59                                   | No              | 166                       |
| 3                           | Male   | Chronic<br>Pyelonephritis     | 1                                                                      | 20,2 | 40                                   | No              | 78                        |
| 4                           | Male   | ADPKD                         | 1                                                                      | 25,7 | 45                                   | No              | 62                        |
| 5                           | Male   | Chronic<br>Pyelonephritis     | 2                                                                      | 22,9 | 73                                   | No              | 150                       |
| 6                           | Male   | ADPKD                         | 1                                                                      | 23,0 | 82                                   | No              | 77                        |
| 7                           | Female | Chronic<br>Glomerulonephritis | 3                                                                      | 24,5 | <15                                  | Yes             | 129                       |
| 8                           | Male   | ADPKD                         | 2                                                                      | 24,7 | 65                                   | No              | 55                        |
| 9                           | Female | ADPKD                         | 1                                                                      | 30,8 | 46                                   | No              | 167                       |
| 10                          | Female | Chronic<br>Glomerulonephritis | 3                                                                      | 24,0 | 37                                   | No              | 187                       |
| 11                          | Female | ADPKD                         | 2                                                                      | 26,0 | 34                                   | No              | 155                       |
| 12                          | Male   | Ureteral Anomalies            | 3                                                                      | 26,0 | <15                                  | Yes             | 64                        |
| 13                          | Male   | Hypertension                  | 3                                                                      | 25,5 | 21                                   | Yes             | 113                       |
| 14                          | Female | Chronic<br>Glomerulonephritis | 2                                                                      | 20,9 | 27                                   | No              | 154                       |
| 15                          | Male   | ADPKD                         | 1                                                                      | 26,6 | 39                                   | No              | 204                       |
| 16                          | Male   | Vescicoureteral reflux        | 1                                                                      | 31,8 | 30                                   | No              | 60                        |
| 17                          | Female | Chronic<br>Glomerulonephritis | 4                                                                      | 18,7 | 31                                   | No              | 131                       |
| 18                          | Male   | ADPKD                         | 3                                                                      | 21,3 | 38                                   | No              | 98                        |

| 19                                   | Female        | Chronic Glomerulonephritis        | 2                                                                                  | 26,5       | 56                              | No                 | 128                                            |
|--------------------------------------|---------------|-----------------------------------|------------------------------------------------------------------------------------|------------|---------------------------------|--------------------|------------------------------------------------|
| 20                                   | Female        | ADPKD                             | 2                                                                                  | 24,9       | 43                              | No                 | 56                                             |
| 21                                   | Male          | ADPKD                             | 2                                                                                  | 26,6       | 25                              | No                 | 72                                             |
| 22                                   | Male          | Chronic Glomerulonephritis        | 3                                                                                  | 22,5       | 19                              | Yes                | 130                                            |
| 23                                   | Female        | Hypertension                      | 4                                                                                  | 21,8       | <15                             | Yes                | 86                                             |
| 24                                   | Male          | Chronic Glomerulonephritis        | 3                                                                                  | 27,2       | 18                              | Yes                | 222                                            |
| 25                                   | Female        | LES                               | 4                                                                                  | 29,0       | <15                             | Yes                | 84                                             |
| <b>Patients dead at follow-up</b>    |               |                                   |                                                                                    |            |                                 |                    |                                                |
| <b><i>At the time of surgery</i></b> |               |                                   |                                                                                    |            | <b><i>At last follow-up</i></b> |                    |                                                |
| <b>Patient n.</b>                    | <b>Gender</b> | <b>Cause of CKD</b>               | <b>Age-adjusted<br/>Charlson<br/>Comorbidity<br/>Index<br/>(excluding<br/>CKD)</b> | <b>BMI</b> | <b>Cause of death</b>           | <b>Re-Dialysis</b> | <b>Graft survival<br/>(mo) <i>at death</i></b> |
| 1                                    | Male          | Nephroangiosclerosis              | 3                                                                                  | 23,5       | Kaposi Sarcoma                  | No                 | 24                                             |
| 2                                    | Female        | Nephronophthisis                  | 4                                                                                  | 21,7       | CMV infection                   | No                 | 8                                              |
| 3                                    | Male          | Iatrogenic Interstitial Nephritis | 2                                                                                  | 22,0       | Unknown                         | No                 | 147                                            |
| 4                                    | Male          | Chronic Glomerulonephritis        | 2                                                                                  | 27,0       | Sepsis                          | No                 | 110                                            |
| 5                                    | Male          | Chronic Glomerulonephritis        | 2                                                                                  | 26,6       | Skin Cancer                     | No                 | 58                                             |
| 6                                    | Male          | Chronic Pyelonephritis            | 1                                                                                  | 20,0       | Respiratory Failure             | No                 | 191                                            |
| 7                                    | Male          | Unknown                           | 3                                                                                  | 24,4       | Stroke                          | No                 | 35                                             |
| 8                                    | Male          | Chronic Glomerulonephritis        | 3                                                                                  | 25,2       | Prostate Cancer                 | No                 | 46                                             |
| 9                                    | Female        | Chronic Glomerulonephritis        | 3                                                                                  | 24,1       | Stroke                          | No                 | 153                                            |

|    |        |                            |   |      |                        |     |     |
|----|--------|----------------------------|---|------|------------------------|-----|-----|
| 10 | Male   | ADPKD                      | 3 | 25,6 | Cerebral infection     | No  | 103 |
| 11 | Male   | Chronic Glomerulonephritis | 3 | 27,8 | Skin Cancer            | No  | 285 |
| 12 | Female | LES                        | 4 | 28,2 | Bladder Cancer         | Yes | 56  |
| 13 | Male   | ADPKD                      | 2 | 24,4 | Stroke                 | No  | 18  |
| 14 | Female | Chronic Pyelonephritis     | 2 | 22,8 | Sepsis                 | Yes | 58  |
| 15 | Male   | LES                        | 2 | 21,9 | HSV infection          | No  | 65  |
| 16 | Male   | Chronic Glomerulonephritis | 2 | 22,8 | Skin Cancer            | No  | 97  |
| 17 | Female | Chronic Glomerulonephritis | 3 | 25,8 | Myocardical infarction | Yes | 119 |
| 18 | Male   | LES                        | 2 | 28,1 | CMV infection          | No  | 87  |

**Supplementary Figure 1.** Flow-chart depicting the follow-up results in our study cohort.

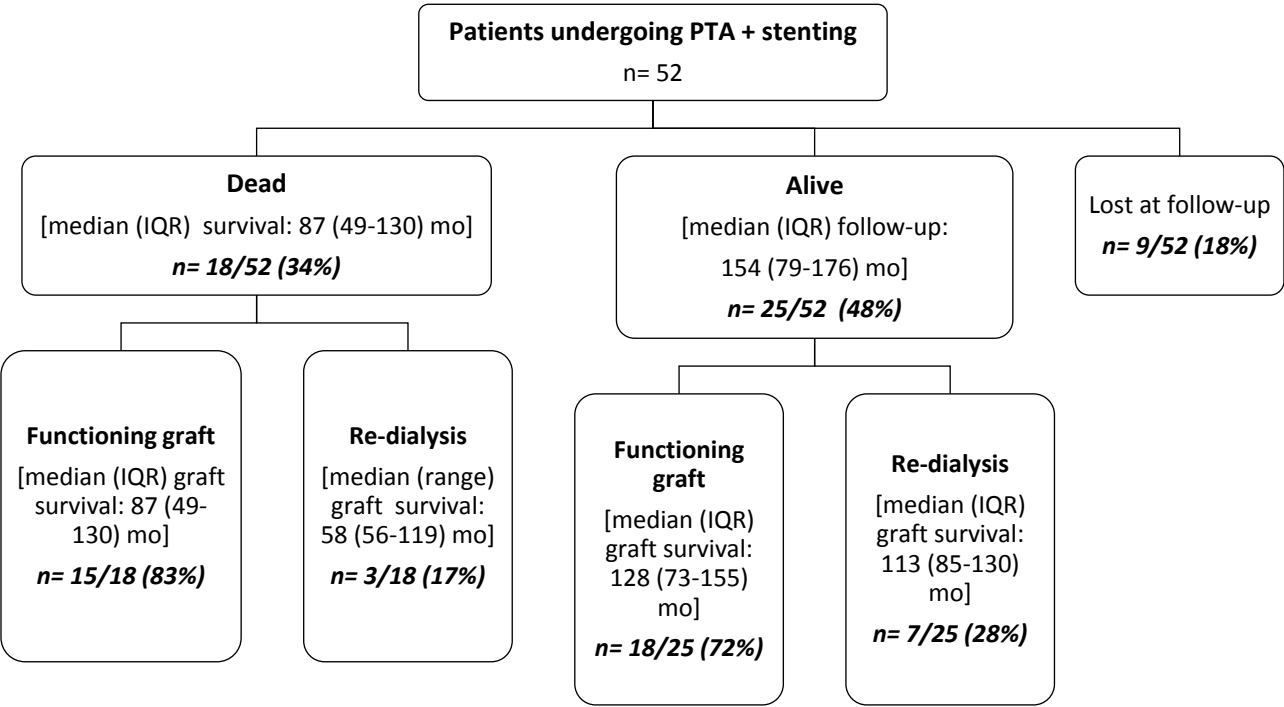

Supplement: f1 [file 2580181.f1.pdf]
